# Supplementary material for: Electrochromic platform for the visual detection of the neuroblastoma biomarkers vanillylmandelic acid and homovanillic acid
Source: Royal Society of Chemistry journal article supplement (doi:10.1039/d5an00228a), 2025-01-01
Supplement: d5an00228a1.pdf [file d5an00228a1.pdf]

## Electrochromic platform for visual indication of neuroblastoma biomarkers vanillylmandelic acid and homovanillic acid

Lu Li, Xiaodi Liu, Shijie Xu, Shiming Zhang\*, Zhuangzhuang Yang, Debao Xiao\*

State Key Laboratory of Flexible Electronics (LoFE) & Institute of Advanced Materials (IAM), School of Flexible Electronics (Future Technologies), Nanjing Tech University (NanjingTech), Nanjing 211816, China.

\*E-mail: iamsmzhang@njtech.edu.cn; iamdbxiao@njtech.edu.cn

### Electrochromic platform for visual indication of the level of VMA and HVA

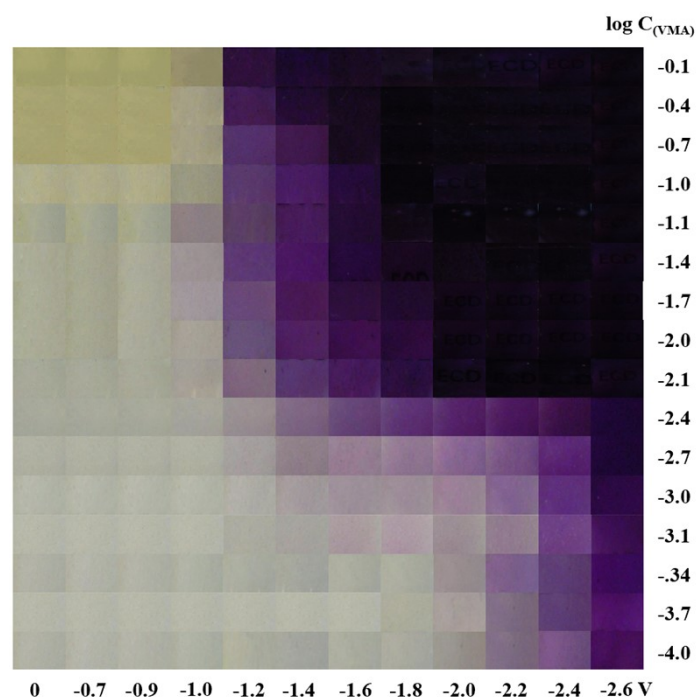

**Fig. S1.** Digital images of DBV-based gel ECD as a function of concentrations of biomarkers VMA from  $10^{-4}$  to 0.8 mol/L under different voltages from 0 to -2.6 V.

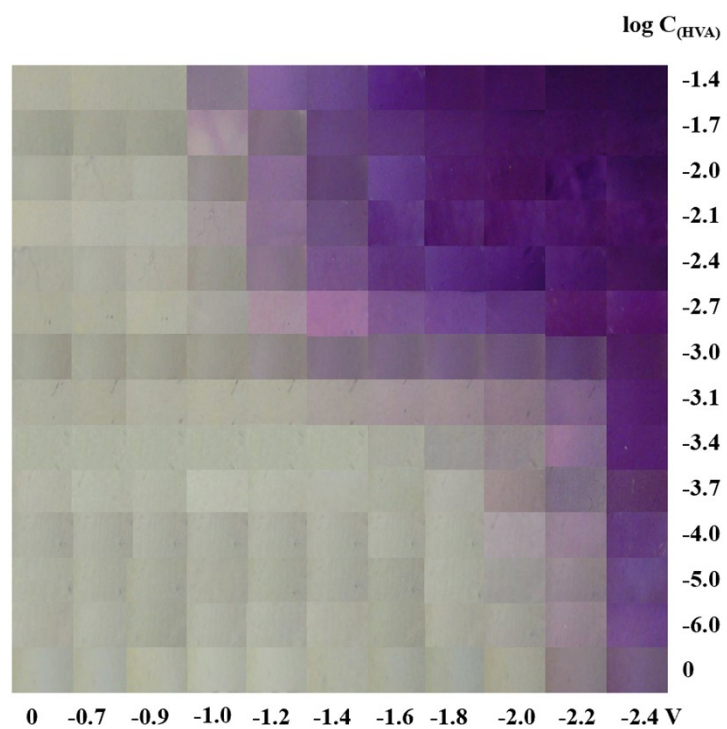

**Fig. S2.** Digital images of DBV-based gel ECD as a function of concentrations of biomarkers HVA from  $10^{-6}$  to 0.04 mol/L under different voltages from 0 to -2.4 V.
